# Supplementary material
Source: publisher figshare collection journal article supplement (https://acs.figshare.com/ndownloader/files/4161421)
Supplement: Supplementary file 1 [file 4161421]

## Supporting Information

SI Figure 1

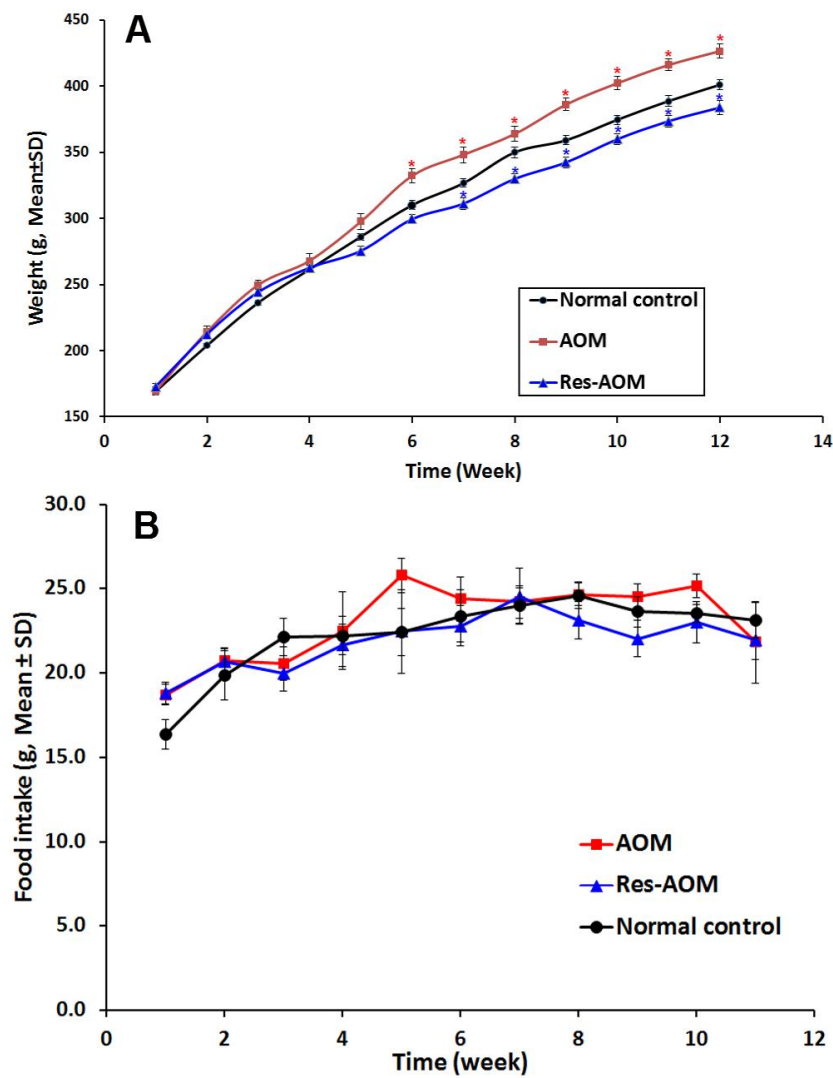

**Supplementary Figure S1.** (A) The body weight gain 1-12 weeks (g) and (B) quantity of food consumption (g) in control group, AOM group and Res-AOM group. \*,  $p < 0.05$ , compared to control group.

SI Figure 2

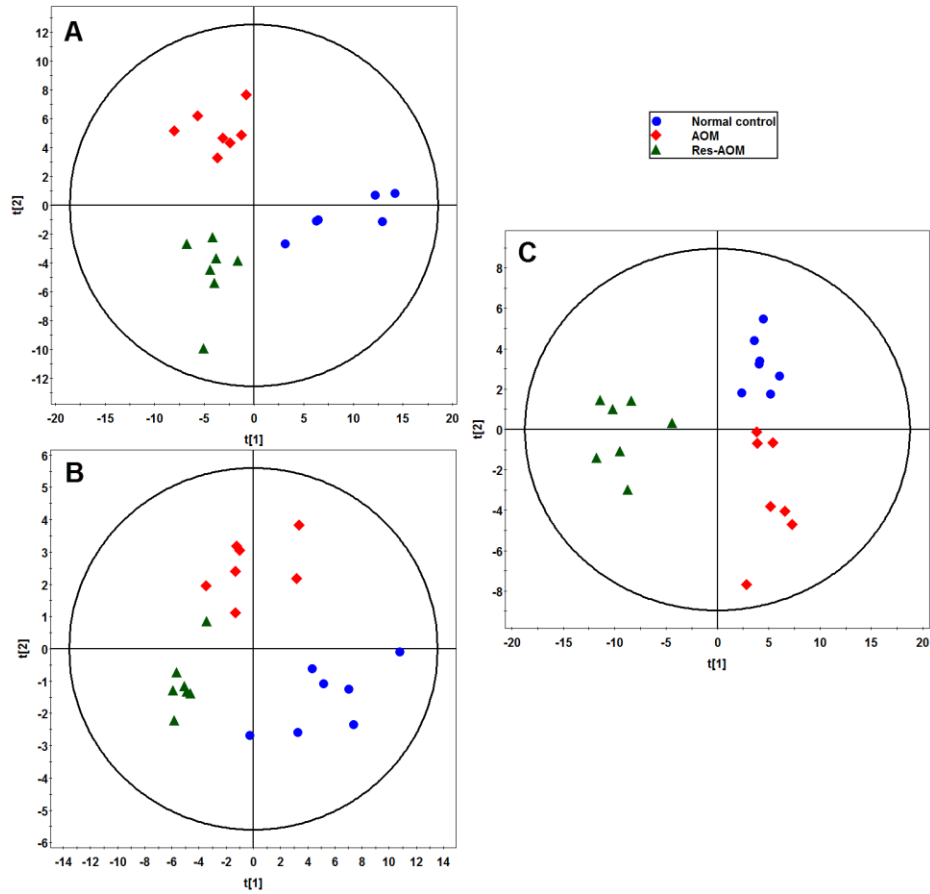

**Supplementary Figure S2.** Metabolic profiles depicted by PLS-DA scores plot of GC-TOFMS

spectral data from the (A) colonic tissue ( $R^2X = 0.286$ ,  $R^2Y = 0.923$ ,  $Q^2(\text{cum}) = 0.608$ ), (B) serum ( $R^2X = 0.453$ ,  $R^2Y = 0.918$ ,  $Q^2(\text{cum}) = 0.549$ ), and (C) urine ( $R^2X = 0.585$ ,  $R^2Y = 0.878$ ,  $Q^2(\text{cum}) = 0.661$ ) of control group, AOM group and Res-AOM group.

SI Figure 3

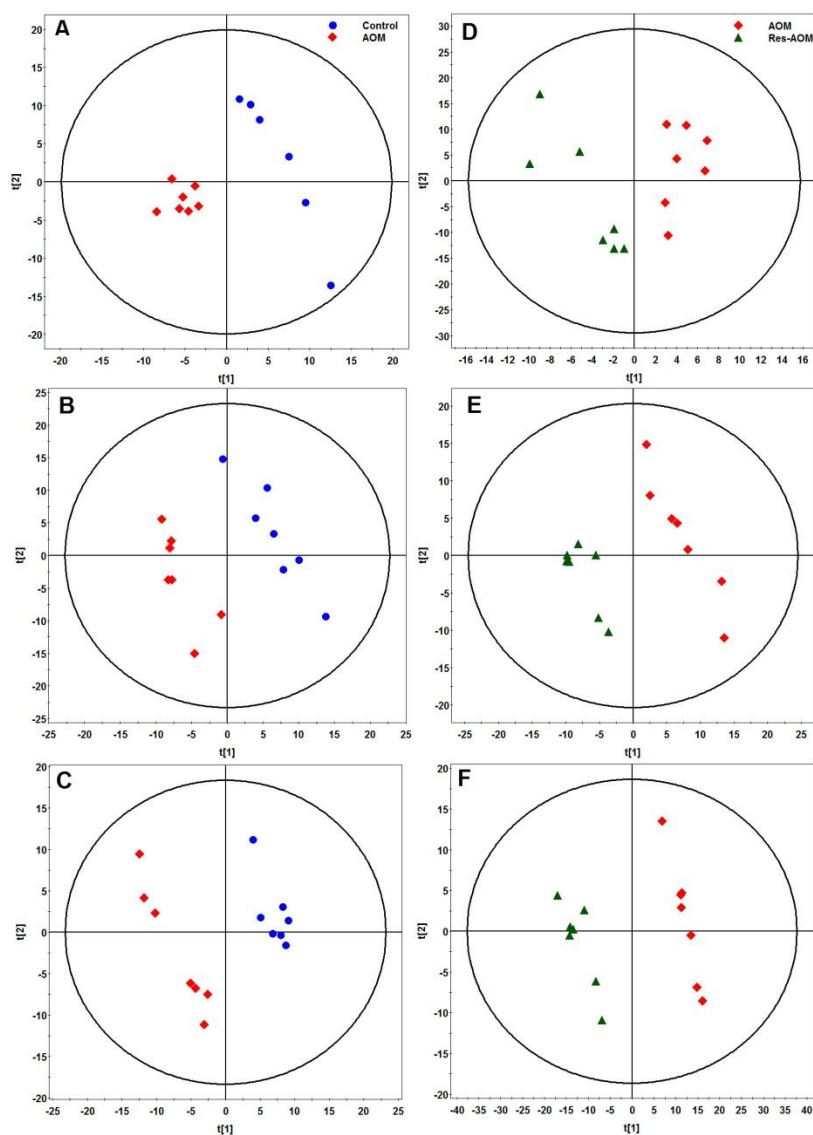

**Supplementary Figure S3. PLS-DA scores plots constructed with all the GC-TOFMS spectral features from colonic tissues (A and D), sera (B and E), and urine (C and F) of control group, AOM group and Res-AOM group.**

SI Figure 4

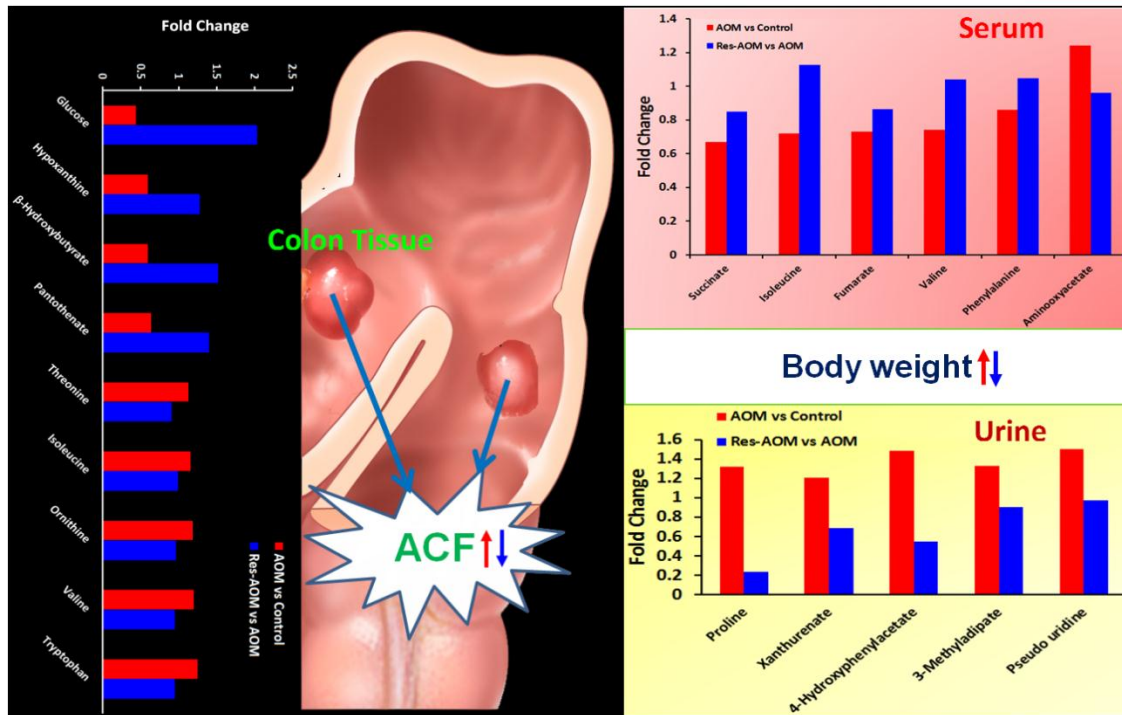

**Supplementary Figure S4.** Disordered metabolism found in colon tissue, serum and urine. Red arrow and bar represents the variation in AOM group as compared to control group; Blue arrow and bar represents the variation in Res-AOM group as compared with AOM group;  $\uparrow$  means increased level;  $\downarrow$  means decreased level.
